## Astrocyte-secreted chordin-like 1 regulates spine density after ischemic stroke

Elena Blanco-Suarez<sup>1,2</sup> and Nicola J Allen<sup>1</sup>

<sup>1</sup>Molecular Neurobiology Laboratory  
Salk Institute for Biological Studies  
10010 N Torrey Pines Road  
La Jolla, CA, 92037, USA

<sup>2</sup>Present address:  
Department of Neurosurgery  
Thomas Jefferson University  
900 Walnut Street  
Philadelphia, PA 19107, USA

Corresponding authors:

Elena Blanco-Suarez: [Elena.BlancoSuarez@jefferson.edu](mailto:Elena.BlancoSuarez@jefferson.edu)

Nicola J. Allen: [nallen@salk.edu](mailto:nallen@salk.edu)

Running title: Chordin-like 1 regulates spine density in stroke

## **Abstract**

Ischemic stroke occurs when the brain is deprived of blood flow, preventing cells from receiving nutrients necessary to perform basic vital functions. In the peri-infarct area neurons undergo an acute loss of dendritic spines along with morphological alterations, which ultimately modify synaptic plasticity and determine neuronal survival. Astrocytes have been shown to play protective or detrimental roles in neuronal survival post-stroke, depending on the specific stage, yet we lack a clear understanding of the underlying mechanisms triggered at these different time points. Recently chordin-like 1 (Chrdl1) was identified as an astrocyte-secreted protein that promotes synaptic maturation and limits experience-dependent plasticity in the mouse visual cortex, leading us to ask if Chrdl1 regulates spine density and recovery from stroke. Using photothrombosis to model ischemic stroke, we studied Chrdl1 KO mice during the acute and subacute phases post-stroke (1 and 7 days after injury, respectively) to assess the potential of Chrdl1 to regulate spine density, glial reactivity and injury volume, characteristics that are involved in functional recovery after ischemia. We find that the absence of Chrdl1 prevents ischemia-induced spine loss in the peri-infarct area, a feature that indicates an important role of astrocytes in recovery from ischemic stroke.

## **Key words**

Astrocyte, photothrombosis, spine density, stroke

## **Introduction**

1 Focal ischemic stroke is a condition characterized by the interruption of blood flow to a specific  
2 region of the brain. This interruption causes an acute depletion of glucose and oxygen,  
3 preventing cellular metabolic function, leading to cell death and tissue damage, and eventual  
4 loss of brain function (1). The brain region depleted of blood flow is referred to as the core of  
5 the injury. Mostly, the cells confined to the core of the injury follow apoptotic and necrotic  
6 pathways causing cell death and preventing neuronal rescue. The surrounding tissue suffers  
7 from a decreased blood supply, and it is called the peri-infarct area. In this region, diverse  
8 cellular and molecular mechanisms are triggered in response to the reduced blood supply and  
9 cell metabolism, which will dictate whether cells in the peri-infarct area survive or follow  
10 delayed cell death (2). It is the peri-infarct area that holds potential for recovery, and  
11 understanding the molecular mechanisms that take place in this region post-stroke is crucial  
12 to promote cell survival over delayed cell death.

13  
14 Several methods are available to mimic ischemic stroke in mouse models (3). In the present  
15 study we use photothrombosis, a technique that consists of transcranial illumination of a brain  
16 region upon injection with Rose Bengal, a photoactivatable dye. This induces the formation of  
17 singlet oxygen that damages the endothelium, promoting platelet aggregation and formation  
18 of thrombi that block the blood supply to the illuminated area, causing similar effects to focal  
19 ischemia in humans (4). After ischemic stroke, there are different phases characterized by the  
20 ability for spontaneous recovery in the peri-infarct area. In the mouse, these phases are  
21 divided into acute (0-2 days post-stroke), sub-acute (2-30 days post-stroke) and chronic  
22 (beyond 30 days post-stroke) (5), with comparable time windows for humans (6). During the  
23 acute phase there is a high rate of cell death in combination with the onset of inflammatory  
24 mechanisms and formation of a glial scar. This is followed by the sub-acute phase, the time  
25 window when endogenous plasticity mechanisms take place to support neural repair. During  
26 the sub-acute phase there is a certain degree of tissue reorganization that determines the  
27 level of repair displayed during the chronic phase. At this late chronic stage, endogenous  
28 mechanisms of plasticity are diminished and neural repair is minimal (5). Currently, it is  
29 unclear what triggers each phase post-stroke, and how to harness the potential of endogenous  
30 plasticity mechanisms in order to promote functional recovery and neural repair at later stages  
31 (i.e chronic phase).

32  
33 Astrocytes play important roles in homeostasis of the central nervous system (CNS), and  
34 some of these functions are of particular importance in the context of ischemic stroke, pointing  
35 to astrocytes as potential targets for neuroprotection (7). Astrocytes are important components  
36 of the neurovascular unit contributing to the integrity of the blood-brain barrier (BBB); they play  
37 an important role in glial scar formation; and they are responsible for clearing excessive  
38 glutamate from the extracellular space which otherwise triggers excitotoxic events (8). In  
39 addition, some evidence has shown how astrocytes and microglia may be involved in diverse  
40 CNS disorders and pathologies, including ischemic stroke (9, 10). Astrocytes, in response to  
41 injury and disease, go through changes in their morphology, molecular mechanisms and  
42 functionality, a response termed astrogliosis, regulated by signaling pathways that are yet to  
43 be fully defined (11). Astrocytes are not isolated, and in fact interact with a variety of cells that  
44 surround the peri-infarct area to regulate different responses such as inflammation or tissue  
45 replacement (12). Microglia are crucial in the regulation of the immune response in the CNS  
46 during stroke. They undergo morphological changes and they are recruited to the injury site  
47 where they release a series of proinflammatory molecules (13). Both astrocytes and microglia  
48 partake in inflammatory mechanisms during ischemic stroke, which promotes both detrimental  
49 and beneficial effects (14).

50  
51 In the healthy brain astrocytes modulate the development, maturation and function of  
52 synapses through the secretion of diverse factors (15), and some of these factors have been  
53 linked to neuroprotective mechanisms in ischemic stroke. For example, thrombospondins-1  
54 and -2 (TSP-1 and -2) are astrocyte-secreted proteins involved in the formation of silent

55 synapses(16). Elimination of TSP-1 and -2 leads to a greater loss of synapses in response to  
56 ischemic stroke which impairs functional recovery, therefore establishing an important role for  
57 astrocyte-secreted proteins in synaptic regulation after stroke (17). In our previous study (18)  
58 we identified chordin-like 1 (Chrdl1), which is enriched in expression in astrocytes in upper  
59 layers of the cortex and the striatum, as an astrocyte-secreted protein responsible for synaptic  
60 maturation in the mouse visual cortex, and therefore, an important regulator of synaptic  
61 plasticity. During normal development the critical period is a time when endogenous plasticity  
62 is enhanced, permitting remodeling of visual circuits in response to a modification in visual  
63 input (19). This endogenous plasticity is greatly diminished at older ages. We demonstrated  
64 that the absence of Chrdl1 increases experience-dependent plasticity in a visual sensory  
65 deprivation paradigm, an effect that was observed not only during periods of high endogenous  
66 plasticity i.e. the visual critical period, but beyond this time into adulthood (18). A study  
67 blocking a different plasticity-limiting molecule that is expressed by neurons, PirB, found this  
68 manipulation also promoted enhanced experience-dependent plasticity, and also proved  
69 beneficial in the context of ischemic stroke by reducing the size of the injury, improving motor  
70 recovery, and decreasing astrocyte reactivity (20). This suggests that targeting endogenous  
71 plasticity-limiting molecules may be beneficial in recovery from ischemic stroke.

72  
73 To enable functional recovery after ischemic stroke, plasticity potential is necessary to  
74 promote functional and structural changes to compensate for lost synapses (21). As Chrdl1  
75 regulates synaptic maturation and limits plasticity, we therefore asked if absence of Chrdl1 is  
76 beneficial to recovery after ischemic stroke by creating a permissive environment to allow  
77 synaptic remodeling. We found that Chrdl1 is significantly upregulated during the acute phase  
78 (24 hours post-stroke) in both the peri-infarct and contralateral hemispheres, whereas at later  
79 timepoints during the sub-acute phase (7 days post-stroke) the expression of Chrdl1 remains  
80 elevated only in the peri-infarct area. Elimination of Chrdl1 *in vivo* prevents the characteristic  
81 spine loss associated with ischemic stroke that has been previously reported (22). Therefore,  
82 we hypothesize that the increase in plasticity-potential in the absence of the astrocyte-  
83 secreted protein Chrdl1 permits faster remodeling in the peri-infarct area after ischemic stroke,  
84 potentially promoting functional recovery.

85

## 86 **Material and Methods**

### 87 **Animals**

88 All animal work was approved by the Institutional Animal Care and Use Committee (IACUC)  
89 of the Salk Institute for Biological Studies, and the ARRIVE guidelines were followed in all  
90 animal experiments.

91 Mice were housed in the Salk Institute animal facility at a light cycle of 12h light:12h dark, and  
92 access to water and food ad libitum.

93 Wild-type (WT) mice (C57BL/6J, Jax stock number 000664) were used for analysis of  
94 expression of *Chrdl1* by in situ hybridization as described below, and to breed to *Chrdl1* KO  
95 mice and Thy1-YFP-J mice (B6.Cg-Tg(Thy1-YFP)HJrs/J, Jax stock number 003782). For  
96 detailed procedure to generate *Chrdl1* KO mice see reference (18). For the generation of  
97 experimental mice heterozygous (+/-) *Chrdl1* females (as *Chrdl1* is in the X chromosome)  
98 were bred to WT (+/y) C57BL/6J males. All experiments were performed using male *Chrdl1*  
99 KO (-/y) and WT (+/y) littermates. Thy1-YFP-J male mice were crossed with heterozygous  
100 *Chrdl1* KO (+/-) females for the generation of Thy1-YFP-J *Chrdl1* KO (-/y) and WT (+/y) males  
101 used for experiments (referred to as YFP-*Chrdl1* KO and WT).

102

### 103 **Photothrombotic ischemic stroke**

104 Male mice at 4 months of age were placed on a stereotaxic frame and anesthetized by 2%  
105 isoflurane in oxygen by constant flow via nose cone. Mice were retro-orbitally injected with  
106 10 mg/ml Rose Bengal (Fisher R323-25) in saline (0.9% NaCl) at a dose of 25mg/kg. Rose  
107 Bengal was prepared fresh before surgeries and protected from light. Control mice subjected  
108 to sham surgeries were injected with the equivalent volume of saline (0.9% NaCl) with no  
109 Rose Bengal, and followed the same procedure. After injection, mice were prepared for  
110 surgery during the 5 minutes allowed for Rose Bengal dye to diffuse. Fur was removed and  
111 the scalp was disinfected with alternative swipes of 70% ethanol and betadine. During surgery  
112 body temperature was monitored and maintained at  $37 \pm 0.5^\circ\text{C}$  with a rectal probe and  
113 feedback-controlled heating pad. An incision through the midline with surgical scissors was  
114 made to expose the skull and locate Bregma. In this study, the brain region to apply  
115 photothrombosis is located at 3.28 mm posterior and 2.80 mm lateral to Bregma. After 5  
116 minutes from Rose Bengal injection and location of stereotaxic coordinates, the brain region  
117 was illuminated through the skull for 10 minutes with a 520nm diode laser (Thor labs) set at  
118 2mm diameter and 10mW power. Skull was then washed with saline 0.9% NaCl and the  
119 incision was closed with Vetbond tissue adhesive (3M 1469Sb). Triple antibiotic and 2%  
120 lidocaine were applied to the closed incision, and the mouse was returned to a clean cage.

121

### 122 **Tissue collection and preparation**

123 Mice were injected intraperitoneally with 100 mg/kg Ketamine (Victor Medical Company) and  
124 20 mg/kg Xylazine (Anased) mix and subjected to transcardial perfusion. Perfusion was  
125 performed with PBS to obtain fresh frozen tissue for fluorescent *in situ* hybridization (FISH).  
126 Those brains were collected, embedded in OCT (Sciagen 4583) and stored at  $-80^\circ\text{C}$  until  
127 analysis. For the rest of experiments, perfusion was performed with PBS followed by 4% PFA  
128 (paraformaldehyde) to obtain fixed tissue. Brains were collected and stored in 4% PFA at  $4^\circ\text{C}$   
129 overnight, after which they were washed three times with PBS and transferred to 30% sucrose  
130 and stored for 3 days at  $4^\circ\text{C}$  for cryoprotection. Those brains were embedded in TFM (General  
131 data healthcare TFM-5), frozen in dry ice/100% ethanol and stored at  $-80^\circ\text{C}$  until analysis. For  
132 TTC staining, mice were euthanized by intraperitoneal injection of ketamine and xylazine mix  
133 and brains were collected without prior perfusion.

134

### 135 **Fluorescent *in situ* hybridization (FISH)**

136 Coronal sections were obtained from WT C57BL/6J mice that went under sham surgeries or  
137 photothrombosis and euthanized 24h or 7 days after surgery to analyze expression of *Chrdl1*.  
138 Sections were made at a thickness of  $16\mu\text{m}$ , cut with a cryostat (Hacker Industries OTF5000)  
139 at coordinates corresponding with the core of the injury (3.28 mm posterior and 2.80 mm  
140 lateral to Bregma). Fluorescent in situ hybridizations (FISH, ACDbio 320850) were performed

141 according to manufacturer's instructions with some modifications. Brain slices were pre-  
142 treated with Protease IV for 20 minutes. Probes used were Chrdl1 (ACDbio 442811),  
143 Slc1a3/GLAST (ACDbio 430781-C2). For negative control we used a 3-plex negative probe  
144 (ACDbio 31043) to determine the background fluorescence. For mounting, slices were applied  
145 with SlowFade gold antifade mountant with DAPI (Thermo Fisher Scientific S36939). On top  
146 of the sections we used coverslips 22 mm x 50 mm 1.5 thickness and sealed with nail polish.  
147 Slc1a3 was imaged in channel 488, and Chrdl1 in channel 550. Three brain sections were  
148 imaged per mouse, and a minimum of 3 mice per condition (sham or stroke). Peri-infarct region  
149 in the ipsilateral hemispheres, and the equivalent region in the contralateral hemispheres were  
150 imaged on a Zeiss LSM 710 confocal microscope using 20x/0.8NA objective as 16 bit images  
151 at 1024 x 1024 pixels (pixel size 0.31x0.31 $\mu$ m) as z-stacks of 5 slices with a total thickness of  
152 6.783  $\mu$ m. Representative images are orthogonal projections. Fluorescence intensity was  
153 measured using ImageJ, and calculated as mean intensity of the ROI multiplied by % of area  
154 stained.

155

### 156 **2,3,5-Triphenyltetrazolium chloride (TTC) staining**

157 Chrdl1 KO and WT male mice were subjected to sham surgeries or photothrombosis and  
158 brains were extracted without prior perfusion 24h or 7 days later after euthanasia by  
159 intraperitoneal injection of overdose of ketamine/xylazine mixture. Brains were cut in 1mm  
160 thick slices and incubated in a pre-warm solution of 2% 2,3,5-Triphenyltetrazolium chloride  
161 (TTC, Sigma T8877) in PBS for 15 minutes at 37°C, protected from light. Sections were  
162 transferred to cold 4% PFA, and later imaged using 0.8X magnification on a stereo zoom  
163 microscope (Nikon SMZ-445). Injury and hemisphere volumes were measured with ImageJ,  
164 and injury volume was expressed as % of ipsilateral hemisphere. At least 3 biological  
165 replicates were used for each time point (24h, 7 days) and condition (sham, stroke), and slices  
166 at 0.7, 1.7, 2.7 and 3.7 mm posterior to Bregma were analyzed.

167

### 168 **GFAP and Iba1 staining**

169 YFP-Chrdl1 KO and YFP-WT male mice were subjected to sham surgeries or  
170 photothrombosis, and perfused 24h or 7 days later with PBS and 4% PFA to collect fixed  
171 tissue. Fixed brains were sliced in the cryostat at a thickness of 16 $\mu$ m and stained for GFAP  
172 or Iba1. Upon collection, slices were incubated in blocking solution (5% goat serum, 0.3%  
173 Triton X-100 in PBS) for 1h at room temperature. Slices were then incubated with rabbit  
174 polyclonal primary antibody anti-GFAP (Abcam ab7260) at a dilution 1:500 or rabbit polyclonal  
175 anti-Iba1 at a dilution 1:250 (Wako 016-20001) in antibody buffer (5% goat serum, 100mM  
176 lysine, 0.3% Triton X-100 in PBS) overnight at 4°C in a humidified chamber. Slices were  
177 washed three times with PBS and incubated with secondary anti-rabbit Alexa 594 (Thermo  
178 Fisher Scientific A11012) in antibody buffer at a dilution of 1:500 for 2h at room temperature.  
179 Slices were washed three times with PBS and mounted using SlowFade gold antifade  
180 mountant with DAPI (Thermo Fisher Scientific S36939), covered with coverslips 22 mm x 50  
181 mm 1.5 thickness and sealed with nail polish. The core and the peri-infarct areas in the  
182 ipsilateral hemisphere and equivalent regions in the contralateral hemisphere were imaged  
183 using a fluorescent microscope Zeiss Axio Imager.Z2. Images were taken using a 10x/0.45NA  
184 objective as 16 bit mosaics of 9 tiles with 10% overlap. To measure fluorescence intensity of  
185 GFAP, a region of interest (ROI) of 1000x1000 pixels (pixel size 0.645x0.645 $\mu$ m) was selected  
186 in the peri-infarct area, and in the homologous contralateral area (see Figure 1A). For Iba1  
187 fluorescence intensity measurements, an ROI in the core of the injury was selected.  
188 Fluorescence intensity was measured using ImageJ, and calculated as mean intensity of the  
189 ROI multiplied by % of area stained.

190

### 191 **Spine imaging and analysis**

192 YFP-Chrdl1 KO and YFP-WT male mice were subjected to sham surgeries or  
193 photothrombosis and perfused 24h or 7 days later to obtain fixed tissue (see tissue preparation  
194 and collection section). Slices were collected from fixed brains in the cryostat at 60 $\mu$ m  
195 thickness at coordinates corresponding with the core of the injury (3.28 mm posterior and 2.80

196 mm lateral to Bregma) and surroundings to be able to image the peri-infarct area. Slices were  
197 mounted using SlowFade gold antifade mountant with DAPI (Thermo Fisher Scientific  
198 S36939) and coverslips 22 mm x 50 mm 1.5 thickness sealed with nail polish. Peri-infarct  
199 region (ipsilateral) and contralateral regions were imaged using a Zeiss LSM 880 Airyscan  
200 FAST super-resolution microscope. Images were taken using the 63x/1.4NA oil-immersion  
201 objective, as 16 bit images at 1648 x 1648 pixels (pixel size 0.04x0.04 $\mu$ m) as z-stacks of 30  
202 steps with a total thickness of 5.51 $\mu$ m. Representative images are orthogonal projections.  
203 Images were analyzed using NeuronStudio software (Computational Neurobiology and  
204 Imaging Center CNIC, Mount Sinai School of Medicine, NY). Measurements were from  
205 secondary dendrites from neurons on layer 5 extending into layers 2/3 of the visual cortex in  
206 the more ventral region of the peri-infarct area and the equivalent region in the contralateral  
207 hemisphere. At least 6 dendrites per mouse were analyzed. Spine classifier within the software  
208 was set as 1.1 $\mu$ m head-to-neck ratio threshold, 2.5 $\mu$ m height-to-width ratio threshold and  
209 mushroom head size of 0.35 $\mu$ m or larger in order to classify spines as immature (stubby or  
210 thin), or mature (mushroom) (23).

211

### 212 **Quantification and statistical analysis**

213 Mice were randomly assigned to sham or stroke groups, and the experimenter was blind to  
214 genotype at the time of analysis. Sample size for each experiment was based on previous  
215 studies in the literature. No animals were excluded from the study.

216 GraphPad Prism 8 (San Diego, CA) was used to design graphs and statistical analysis.

217 *In situ* hybridizations in Figure 1 and Sup Fig 1; TTC staining in Figure 2; immunostaining  
218 experiments in Figure 3, 4 and Sup Fig 3 and 4; and spine density in Figure 5B,F and Sup  
219 Figure 5B,F were analyzed using 2-way ANOVA with Sidak's post-hoc test. One-way ANOVA  
220 with Tukey's multiple comparison test was used to analyze the spine morphology dataset in  
221 Figure 5C,D,G,H and Sup Figure 5C,D,G,H. Results are shown as mean  $\pm$  S.D. with dots  
222 representing mice, and graphs show exact p-values. Full statistical calculations are presented  
223 in Sup Table 1.

## 224 **Results**

### 225 **Chrdl1 expression increases in response to ischemic conditions**

226 In response to ischemic stroke caused by MCAO (middle cerebral artery occlusion), the  
227 expression of various astrocytic genes is altered (24). SPARC and TSP-1, both astrocyte-  
228 secreted factors with synaptogenic roles, are upregulated during the acute phase and they  
229 have been linked to functional recovery (17, 25). Here we used photothrombotic stroke to  
230 cause ischemia in the visual cortex of 4 month old male mice to study the role of Chrdl1. The  
231 effects were analyzed during the acute (24 hours post-stroke) and sub-acute (7 days post-  
232 stroke) phases, two stages post-injury characterized by different plasticity levels. The sub-  
233 acute phase is considered the time window during which, given the enhanced endogenous  
234 plasticity, recovery and neural repair is facilitated (6).

235  
236 Due to its role in synaptic plasticity, and previous microarray data showing that Chrdl1  
237 expression is increased by MCAO (24), we hypothesized that Chrdl1 expression could be  
238 regulated in response to ischemic stroke in confined areas of the injured brain. By  
239 fluorescence *in situ* hybridization (FISH), we analyzed RNA expression of Chrdl1 in the peri-  
240 infarct area (ipsilateral, ipsi) and in the homologous contralateral (contra) hemisphere (Figure  
241 1A). We found that expression of Chrdl1, which we previously demonstrated to be astrocyte-  
242 specific (18), was upregulated in astrocytes in the peri-infarct area of WT mice during the acute  
243 phase (24 hours after insult) (Figure 1B,C, ipsi: sham  $23.5 \pm 5.8$  a.u., stroke,  $83.2 \pm 3.1$  a.u.).  
244 This increase in the expression of Chrdl1 was also observed in non-injured tissue on the  
245 contralateral hemisphere to the lesion, (Figure 1B,C, contra: sham,  $32.5 \pm 9.6$  a.u., stroke,  
246  $73.2 \pm 7.9$  a.u.). During the sub-acute phase (7 days post-stroke) the expression of Chrdl1 in  
247 the contralateral hemisphere was restored to physiological levels (Figure 1D,E contra: sham,  
248  $127.9 \pm 4.8$  a.u., stroke,  $187.7 \pm 15.6$  a.u.), whereas the increased expression in the peri-infarct  
249 area was persistent and significantly increased (Figure 1D,E ipsi: sham,  $150.1 \pm 2.6$  a.u.,  
250 stroke,  $636.3 \pm 70.1$  a.u.). This suggests that the upregulation of astrocytic Chrdl1 after  
251 ischemic stroke may trigger mechanisms that hinder synaptic plasticity, obstructing synaptic  
252 regeneration and hampering recovery.

253  
254 We also analyzed the expression of the astrocyte-enriched gene Slc1a3 (Glutamate Aspartate  
255 Transporter, GLAST) to see whether the changes in expression that we observed in Chrdl1  
256 were specific to Chrdl1 or shared by other astrocyte genes. GLAST was chosen due to its  
257 important roles in glutamate uptake in the context of excitotoxic injuries such as ischemic  
258 stroke (26). We found that GLAST was stable in the peri-infarct area (Sup Figure 1A,B ipsi:  
259 sham,  $362.4 \pm 52.9$  a.u., stroke,  $445.2 \pm 21.5$  a.u.) and in the homologous contralateral region  
260 during the acute phase (Sup Figure 1A,B, contra: sham  $319.2 \pm 45.3$  a.u., stroke  $375.5 \pm 83.9$   
261 a.u.). During the sub-acute phase, and similar to what we observed with the expression of  
262 Chrdl1, GLAST expression increased in the peri-infarct area (Sup Figure 1C,D, ipsi: sham,  
263  $561.8 \pm 35.7$  a.u., stroke,  $913.5 \pm 119.5$  a.u.), while in the homologous contralateral region  
264 there was no significant upregulation (Sup Figure 1C,D contra: sham,  $552.2 \pm 31.9$  a.u., stroke,  
265  $855.4 \pm 56.1$  a.u.). These results demonstrate that both Chrdl1 and GLAST expression are  
266 upregulated in response to stroke but with distinct time courses, with Chrdl1 upregulation  
267 showing more rapid changes than GLAST in response to the same sort of injury.

### 268 269 **Absence of Chrdl1 does not affect injury volume**

270 One factor that determines the severity of the injury is the size of the brain region affected by  
271 the deprivation of blood supply. Increasing plasticity can help repair and remap neuronal  
272 circuits that were damaged during the ischemic episode (27). It has been shown that  
273 manipulating astrocytic or neuronal plasticity-regulating molecules contributes to reducing the  
274 size of the injury and improved functional recovery (17, 20). In our previous study we found  
275 that constitutive Chrdl1 KO mice display enhanced experience-dependent plasticity in the  
276 visual system (18), thus we hypothesized that Chrdl1 KO mice would show decreased injury  
277 volume after an ischemic lesion. To address this we performed photothrombosis in male  
278 Chrdl1 KO (-/-) and WT (+/+) mice. However, absence of Chrdl1 did not affect the volume of



279 the injury during the acute phase (Figure 2A,B, 24h post-stroke, WT: -0.7mm from Bregma  
280  $1.5 \pm 1.5\%$ , -1.7mm from Bregma  $23.4 \pm 6.9\%$ , -2.7mm from Bregma  $28.5 \pm 12.3\%$ , -4.7mm  
281 from Bregma  $21.2 \pm 4.9\%$ , Chrdl1 KO: -0.7mm from Bregma  $4.7 \pm 4.7\%$ , -1.7mm from Bregma  
282  $14.5 \pm 6.3\%$ , -2.7mm from Bregma  $21.1 \pm 2.9\%$ , -4.7mm from Bregma  $18.8 \pm 2.6\%$ ). The injury  
283 volume during the sub-acute phase was also unaltered in the absence of Chrdl1 (Figure 2C,D,  
284 7days post-stroke, WT: -0.7mm from Bregma  $0.0 \pm 0.0\%$ , -1.7mm from Bregma  $6.7 \pm 3.4\%$ , -  
285 2.7mm from Bregma  $8.6 \pm 3.3\%$ , -4.7mm from Bregma  $6.5 \pm 1.6\%$ , Chrdl1 KO: -0.7mm from  
286 Bregma  $0.0 \pm 0.0\%$ , -1.7mm from Bregma  $8.0 \pm 2.4\%$ , -2.7mm from Bregma  $7.3 \pm 2.6\%$ , -  
287 4.7mm from Bregma  $4.9 \pm 2.4\%$ ). As expected, mice subjected to sham surgeries did not show  
288 any injury (Sup Figure 2). This demonstrates that Chrdl1 does not impact the progression of  
289 the size of the core of the injury, and any potential role for Chrdl1 may reside in the surrounding  
290 tissue corresponding to the peri-infarct area.

291

### 292 **Reactive astrogliosis is not impaired in Chrdl1 KO mice after stroke**

293 As a consequence of ischemic stroke, astrocytes become reactive in the peri-infarct area and  
294 undergo molecular, morphological and functional changes that drive the formation of the glial  
295 scar surrounding the core of the injury (28). GFAP (glial fibrillary acidic protein) is a  
296 cytoskeletal protein that is upregulated in astrocytes in response to different types of CNS  
297 injury, and it is an indicator of reactive astrogliosis (28). We measured GFAP intensity to  
298 assess whether Chrdl1 played a role in attenuation or intensification of reactive astrogliosis in  
299 the peri-infarct area of WT and Chrdl1 KO mice. During the acute phase we did not detect  
300 significant increases in GFAP in either WT or Chrdl1 KO peri-infarct areas (Figure 3A,B, 24h  
301 post-stroke, WT: sham,  $37.5 \pm 14.2$  a.u., stroke,  $48.9 \pm 9.9$  a.u., Chrdl1 KO: sham,  $39.4 \pm 8.1$   
302 a.u., stroke,  $28.3 \pm 14.7$  a.u.). During the sub-acute phase we detected an increased intensity  
303 in GFAP staining which was significant, but independent of Chrdl1 expression (Figure 3C,D,  
304 7 days post-stroke, WT: sham,  $16.0 \pm 7.6$  a.u., stroke,  $328.1 \pm 64.1$  a.u., Chrdl1 KO: sham,  
305  $11.7 \pm 4.6$  a.u., stroke,  $257.9 \pm 94.3$  a.u.). There were no variations in GFAP levels in the  
306 contralateral hemisphere during the acute phase (Sup Figure 3A,B 24h post-stroke, WT:  
307 sham,  $33.1 \pm 11.6$  a.u., stroke,  $24.8 \pm 16.2$  a.u., Chrdl1 KO: sham,  $44.5 \pm 14.6$  a.u., stroke,  
308  $14.9 \pm 10.8$  a.u.) or sub-acute phase (Sup Figure 3C,D 7days post-stroke, WT: sham,  $5.3 \pm$   
309  $1.6$  a.u., stroke,  $7.5 \pm 1.2$  a.u., Chrdl1 KO: sham,  $16.6 \pm 7.8$  a.u., stroke,  $8.7 \pm 3.7$  a.u.). Our  
310 results indicate that Chrdl1 does not regulate GFAP, a protein involved in reactive astrogliosis  
311 and in the glial scar formation in certain pathological contexts (29), suggesting that Chrdl1  
312 may not play relevant roles in reactive astrogliosis.

313

### 314 **Absence of Chrdl1 does not affect the microglia response after stroke**

315 Microglia have important roles in neuroinflammation, however, it is unclear what determines  
316 their beneficial or detrimental function in response to ischemic stroke. In response to stroke,  
317 Iba1+ microglial cells increase in the core of the injury which indicates activation of a microglial  
318 response (30). We assessed if there was a role for Chrdl1 in microglia activation by performing  
319 Iba1 staining of WT and Chrdl1 KO tissue after stroke. In the core of the injury Iba1 fluorescent  
320 signal was not evident during the first 24 hours post-stroke corresponding to the acute phase  
321 (Figure 4A,B, 24h post-stroke, WT: sham,  $121.5 \pm 75.4$  a.u., stroke,  $82.0 \pm 65.4$  a.u., Chrdl1  
322 KO: sham,  $90.0 \pm 45.0$  a.u., stroke,  $63.8 \pm 59.9$  a.u.), but it was apparent at 7 days post-stroke,  
323 during the sub-acute phase, in both WT and Chrdl1 KO mice (Figure 4C,D, 7days post-stroke,  
324 WT: sham,  $25.4 \pm 5.6$  a.u., stroke,  $1043.3 \pm 210.8$  a.u., Chrdl1 KO: sham,  $17.5 \pm 8.2$  a.u.,  
325 stroke,  $634.3 \pm 240.1$  a.u.). In both WT and Chrdl1 KO mice, differences in microglia activation  
326 were not observed in the contralateral hemisphere during the acute phase (Sup Figure 4A,B  
327 24h post-stroke, WT: sham,  $115.7 \pm 65.8$  a.u., stroke,  $76.1 \pm 45.9$  a.u., Chrdl1 KO: sham,  $94.0$   
328  $\pm 46.8$  a.u., stroke,  $108.2 \pm 79.4$  a.u.) or the sub-acute phase (Sup Figure 4C,D 7days post-  
329 stroke, WT: sham,  $27.1 \pm 7.5$  a.u., stroke,  $30.5 \pm 15$  a.u., Chrdl1 KO: sham,  $14.2 \pm 5.0$  a.u.,  
330 stroke,  $20.6 \pm 8.4$  a.u.). Our results indicate that Chrdl1 does not have a large effect on the  
331 microglia response to ischemic stroke.

332

333

### 334 **Absence of Chrdl1 prevents spine loss in the peri-infarct area**

335 Immediately after ischemic stroke, there is an acute loss of dendritic spines in the peri-infarct  
336 area in WT mice. The decreased spine density is severe during the acute phase, and  
337 persistent at later stages with signs of potential recovery during the sub-acute phase (22).  
338 However, the exact mechanisms that promote recovery of spine density are not completely  
339 understood. The absence of Chrdl1 does not affect spine density or morphology in uninjured  
340 adult mice (18), but we hypothesized that it may have an effect in response to ischemic stroke,  
341 as was observed in other studies where plasticity-regulating proteins were eliminated (31). To  
342 this end, WT and Chrdl1 KO mice where layer 5 neurons express the fluorescent protein YFP  
343 were subjected to sham surgeries or photothrombotic stroke in the visual cortex, and spine  
344 density of secondary dendrites extending into layers 2/3 of the visual cortex were analyzed.  
345 WT mice subjected to photothrombotic stroke displayed severe loss of spines in the peri-infarct  
346 area during the acute phase (Figure 5A,B, 24h post-stroke, WT: sham,  $1.17 \pm 0.08$   
347 protrusion/ $\mu\text{m}$ , stroke,  $0.50 \pm 0.11$  protrusion/ $\mu\text{m}$ ), a well-documented consequence of  
348 ischemic stroke (22, 32, 33). Interestingly, Chrdl1 KO mice did not show the characteristic  
349 ischemic-induced decrease in spine density during the acute phase (Figure 5A,B, 24h post-  
350 stroke, Chrdl1 KO: sham,  $1.10 \pm 0.15$  protrusion/ $\mu\text{m}$ , stroke,  $1.22 \pm 0.17$  protrusion/ $\mu\text{m}$ ),  
351 suggesting that absence of Chrdl1 prevents the initial degeneration of synaptic structures in  
352 the peri-infarct area. We observed that spine loss in the peri-infarct area was persistent in WT  
353 mice during the sub-acute phase, though not as severe as initially observed (Figure 5E,F 7  
354 days post-stroke, WT: sham,  $1.46 \pm 0.12$  protrusion/ $\mu\text{m}$ , stroke,  $0.91 \pm 0.08$  protrusion/ $\mu\text{m}$ ).  
355 During the sub-acute phase, Chrdl1 KO mice displayed spine numbers similar to those mice  
356 that went under sham surgeries (Figure 5E,F 7 days post-stroke, Chrdl1 KO: sham,  $1.47 \pm$   
357  $0.15$  protrusion/ $\mu\text{m}$ , stroke,  $1.25 \pm 0.08$  protrusion/ $\mu\text{m}$ ), suggesting that absence of Chrdl1  
358 protects from spine loss rather than delaying the neurodegenerative processes that drive spine  
359 elimination after stroke. Neither WT nor Chrdl1 KO mice showed variation in spine density in  
360 the contralateral hemisphere (Sup Figure 5A,B,E,F).

361  
362 One possibility is that Chrdl1 KO mice experience spine loss with a fast turnover during the  
363 early acute phase (first 24 hours post-insult), in which case an increase in immature spine  
364 morphologies would be expected compared to mice that went under sham surgeries. We  
365 found that WT mice showed a significant decrease in mature spines after stroke (Figure 5C,  
366 WT: sham  $0.33 \pm 0.02$  protrusion/ $\mu\text{m}$ , stroke,  $0.10 \pm 0.03$  protrusion/ $\mu\text{m}$ ). Chrdl1 KO did not  
367 show any alterations in mature spine density in the peri-infarct area during the acute phase  
368 (Figure 5C, Chrdl1 KO: sham,  $0.31 \pm 0.06$  protrusion/ $\mu\text{m}$ , stroke,  $0.33 \pm 0.04$  protrusion/ $\mu\text{m}$ ).  
369 During the acute phase, WT mice also showed a decrease in immature spine density (Figure  
370 5D, WT: sham  $0.84 \pm 0.08$  protrusion/ $\mu\text{m}$ , stroke,  $0.40 \pm 0.08$  protrusion/ $\mu\text{m}$ ), whereas Chrdl1  
371 KO mice had a constant density of immature spines after stroke compared to sham animals  
372 (Figure 5D, Chrdl1 KO: sham,  $0.79 \pm 0.12$  protrusion/ $\mu\text{m}$ , stroke,  $0.89 \pm 0.13$  protrusion/ $\mu\text{m}$ ).  
373 During the sub-acute phase, the WT mice showed restoration of mature spine density (Figure  
374 5G, WT: sham,  $0.28 \pm 0.06$  protrusion/ $\mu\text{m}$ , stroke,  $0.20 \pm 0.01$  protrusion/ $\mu\text{m}$ ), while the Chrdl1  
375 KO mice showed no changes in the mature spine density (Figure 5G, Chrdl1 KO: sham,  $0.31$   
376  $\pm 0.08$  protrusion/ $\mu\text{m}$ , stroke,  $0.29 \pm 0.06$  protrusion/ $\mu\text{m}$ ). On the other hand, density of  
377 immature spines in the WT mice during the sub-acute phase remained low (Figure 5H, WT:  
378 sham  $1.18 \pm 0.13$  protrusion/ $\mu\text{m}$ , stroke,  $0.71 \pm 0.08$  protrusion/ $\mu\text{m}$ ). During the sub-acute  
379 phase Chrdl1 KO mice did not experience delayed loss of immature spines as the density of  
380 the spines with immature morphology remained at comparable levels to the acute phase  
381 (Figure 5H, Chrdl1 KO: sham,  $1.16 \pm 0.21$  protrusion/ $\mu\text{m}$ , stroke,  $0.96 \pm 0.02$  protrusion/ $\mu\text{m}$ ).  
382 There were no significant morphological changes in the contralateral hemisphere of WT or  
383 Chrdl1 KO in response to stroke (Sup Figure 5C,D,G,H). This indicates that the absence of  
384 Chrdl1 protected the peri-infarct neurons from the typical spine loss observed in WT mice in  
385 response to ischemic stroke, rather than promoting more rapid recovery of spines.

## 386 **Discussion**

387 In this study we investigated the contribution of the astrocyte-enriched synapse-regulating  
388 protein Chrdl1 to protection from ischemic stroke. We found that Chrdl1 is upregulated after  
389 stroke, and that removal of Chrdl1 prevents neuronal dendritic spine loss that is characteristic  
390 of the acute phase after injury. We further found that this protective role of Chrdl1 is  
391 independent of reactive gliosis and does not impact on the initial size of the injury.

392

### 393 **Astrocytic Chrdl1 expression increases in response to ischemic stroke**

394 We found that Chrdl1 expression is upregulated in the acute phase after stroke in the peri-  
395 infarct area and in the contralateral hemisphere, and that the upregulation is persistent during  
396 the sub-acute phase only in the peri-infarct area (Figure 1B-E). Contralateral alterations are  
397 possible in response to a focal injury as observed before (34) but the mechanisms are yet to  
398 be fully described. We also found that the glutamate aspartate transporter (GLAST) is  
399 increased in expression in the sub-acute phase, but not the acute phase. In ischemia there is  
400 a massive release of glutamate into the synaptic cleft that ultimately triggers excitotoxicity and  
401 cellular death, and astrocytes play important roles in re-uptake of excessive glutamate  
402 including through GLAST (35). The differential temporal changes of Chrdl1 and GLAST  
403 expression in response to stroke suggest that dysregulation of these factors may be persistent  
404 at later timepoints during the chronic phase (30+ days post-stroke) and that other astrocyte  
405 factors may also display differential temporal regulation in response to the same kind of injury.  
406 The increased expression of Chrdl1 may limit plasticity during the sub-acute phase, a time  
407 when post-stroke endogenous plasticity is enhanced (5), as suggested by the apparent  
408 stability of dendritic spines observed in Chrdl1 KO mice. In the future it will be important to  
409 assess astrocyte gene expression during the acute, sub-acute and chronic phases, as they  
410 may dictate the endogenous plasticity levels that determine functional recovery and circuit  
411 remodeling in response to injury.

412

### 413 **Progression of injury volume is independent of Chrdl1 expression**

414 The size of the injury has important implications in the functional outcome from ischemic  
415 stroke. Normally, larger injury sizes are more likely to have fatal outcomes (36). Blockade of  
416 Chrdl1 promotes enhanced experience-dependent plasticity in the brains of mice (18) and so  
417 we hypothesized that absence of Chrdl1 may facilitate recovery from stroke through reduction  
418 of injury volume, as has been shown for other plasticity limiting molecules (20). We found,  
419 however, that absence of Chrdl1 did not have any effects on the volume of the injury (Figure  
420 2, Sup Figure 2). This is in contrast to a study where Noggin, a BMP (Bone Morphogenetic  
421 Protein) antagonist similar to Chrdl1, was over-expressed and shown to promote reduction in  
422 injury size and improved behavioral outcomes (37), suggesting differences in mode of action  
423 of these different BMP inhibitors. Interestingly, a previous study on thrombospondin-1 and -2,  
424 two astrocyte-secreted synaptogenic proteins, showed that their absence did not play a role  
425 in the size of the injury, but impaired functional recovery (17). In the future it will be interesting  
426 to assess the levels of other proteins that have been previously identified to regulate the size  
427 of the injury during ischemic stroke, and assess whether their expression is altered in Chrdl1  
428 KO mice to trigger mechanisms that maintain injury volume.

429

### 430 **Chrdl1 does not impact reactive gliosis**

431 Glial cells respond to diverse types of injury and disease through a series of molecular and  
432 morphological changes that group under the term reactive gliosis. In the case of astrocytes,  
433 reactive astrogliosis in its most severe form leads to the formation of the glial scar (28).  
434 According to our results based on GFAP immunohistochemistry, Chrdl1 absence does not  
435 have an effect on reactive astrogliosis (Figure 3, Sup Figure 3), suggesting that scar formation  
436 is Chrdl1-independent in the context of ischemic stroke. This can explain why the absence of  
437 Chrdl1 does not affect the volume of the injury in Chrdl1 KO mice when compared to WT mice  
438 (Figure 2), as the formation of the glial scar is not affected by knocking out Chrdl1. The effects  
439 of Chrdl1 appear to be related to neuronal plasticity mechanisms in response to external  
440 stimuli, such as sensory deprivation (18) or injury, rather than intrinsic mechanisms of

441 astrocytes themselves that lead to reactive astrogliosis and formation of the glial scar. Further  
442 experiments to analyze other reactive markers like Lcn2 or Serpina3n among others (24) will  
443 clarify whether Chrdl1 regulates astrogliosis in ischemic stroke.

444  
445 The immune response in ischemic stroke is regulated by various glial cell types that also  
446 interact among themselves to regulate inflammation, and these glia-mediated mechanisms  
447 can exert both beneficial and detrimental effects (13). Astrocytes and microglia are two  
448 important components of the neurovascular unit, and both are activated in response to  
449 ischemic stroke, as well as other types of CNS injuries (38). It has been previously shown that  
450 activated microglia can induce reactive astrogliosis with neurotoxic effects (39), but the  
451 mechanisms that regulate microglia activation are still not completely clear. In the present  
452 study we found that absence of Chrdl1 does not affect microglia activation, as demonstrated  
453 by Iba1 immunostaining (Figure 4, Sup Figure 4). This suggests that Chrdl1 does not play a  
454 role in the inflammatory response in stroke, an important feature that leads to further damage  
455 beyond the core and the peri-infarct areas, contributing to the extension of the injury and worse  
456 outcomes. It has been previously reported that other BMP antagonists, such as Noggin, play  
457 important roles in the microglia response in ischemic stroke (37). As Chrdl1 is also a BMP  
458 antagonist it will be important to determine if it regulates microglia activation at later time points  
459 post-stroke for example during the chronic phase, when typically the microglial response is  
460 reduced. Therefore, the beneficial effects of Chrdl1 removal on dendritic spines do not appear  
461 to be related to inflammation or astrogliosis.

#### 462 463 **Absence of Chrdl1 prevents spine loss in the peri-infarct area after ischemic stroke**

464 In response to ischemic stroke neurons in the peri-infarct region undergo deep remodeling,  
465 featuring spine loss and morphological modifications which are especially severe during the  
466 acute phase (22). During later stages post-stroke, spontaneous mechanisms promote  
467 spinogenesis, but those mechanisms remain unclear. Since we found an increased  
468 expression of Chrdl1 in response to ischemic injury that may hinder synaptic remodeling, we  
469 hypothesized that eliminating Chrdl1 could protect spine loss or promote faster spine turnover  
470 to compensate for the ischemic damage. We found that Chrdl1 KO mice did not show the  
471 characteristic spine loss in the peri-infarct area in response to ischemic stroke during either  
472 acute or sub-acute phases (Figure 5, Sup Figure 5). We did not observe any alteration in spine  
473 morphology, suggesting that absence of Chrdl1 protects spines from ischemic-driven pruning  
474 rather than promoting a quick turnover in response to ischemic lesion. In the future live  
475 imaging experiments will help to determine whether spines in Chrdl1 KO mice are stable and  
476 protected in response to ischemic stroke. Therefore time- and region-dependent Chrdl1  
477 upregulation may hinder remodeling of damaged circuits by preventing formation and/or  
478 restructuring of neuronal synapses.

#### 479 480 **Chrdl1 may play different roles depending on the post-stroke phase**

481 Our work shows that increased expression of Chrdl1 can be a detrimental contribution from  
482 astrocytes that impedes recovery by limiting plasticity and circuit remodeling. But how can  
483 Chrdl1 hinder recovery? As outlined above, one possibility is by blocking BMP signaling  
484 mechanisms. It has been previously shown that administration of BMP7 24 hours after  
485 ischemic stroke improves behavioral recovery (40). Post-stroke upregulation of Chrdl1, a  
486 known BMP antagonist with affinity for BMP4, 6 and 7 (41), could be blocking the beneficial  
487 effects of BMPs after ischemic stroke. Blockade of Chrdl1 after ischemic stroke may therefore  
488 represent a new approach to promote the neurorestorative roles of BMPs. However, different  
489 BMPs may play diverse roles in stroke, promoting recovery or delayed cell death. In a different  
490 study it was found that over-expressing the BMP antagonist Noggin had neuroprotective  
491 effects by reducing the size of the injury (37). Noggin has high affinity for BMP4, like Chrdl1  
492 (41). Therefore it is important to determine the specific post-stroke phase in which to  
493 manipulate Chrdl1 in order to promote beneficial effects.

494

495 An alternative explanation for the protective effect of Chrdl1 after stroke is through its role as  
496 a regulator of synapse maturation and synaptic AMPAR composition (18). Excessive  
497 glutamate release in response to ischemic stroke stimulates GluA2-lacking AMPARs, which  
498 are permeable to  $Ca^{2+}$ , a process known as excitotoxicity that triggers injurious signals that  
499 ultimately lead to delayed neuronal death (42). This occurs immediately following ischemic  
500 injury, and later effects on GluA2-containing AMPARs have not been thoroughly analyzed.  
501 The presence of the subunit GluA2 renders the AMPAR impermeable to  $Ca^{2+}$ , and thus  
502 upregulation of Chrdl1 may play a beneficial role following excitotoxic injury (i.e. during the  
503 acute phase post-stroke) as it increases the number of  $Ca^{2+}$ -impermeable GluA2-containing  
504 AMPARs on the neuronal surface (18). However, high expression of Chrdl1 at later stages  
505 post-stroke (for example during the sub-acute phase as we observed) could lead to limited  
506 plasticity, preventing synaptic remodeling and ultimately recovery. These previous studies and  
507 our own results suggest that Chrdl1 may be playing different roles at the various stages post-  
508 stroke and have variable effects on different neuronal populations, and so in the future it will  
509 be important to analyze the expression of Chrdl1 at later time points during chronic (30+ days  
510 post-stroke) phase post-stroke and in other brain regions.

511  
512 In conclusion, our results indicate that astrocyte-secreted factors play a role in circuit  
513 remodeling after ischemic insult, and Chrdl1 in particular may hamper recovery during the sub-  
514 acute phase due to its role in limiting plasticity in the cortex. The restricted regional expression  
515 of Chrdl1 suggests that alternative astrocyte-secreted factors that regulate plasticity and spine  
516 density in other brain regions may also mediate plasticity mechanisms in response to region-  
517 specific ischemic injury in a time-dependent manner. This study highlights the importance of  
518 dissecting astrocyte-mediated plasticity mechanisms to understand the limitations in circuit  
519 remodeling in response to injury and other pathologies of the CNS, and design new strategies  
520 to promote neuroprotection and recovery at different time points post-stroke.

521

522 **Acknowledgements**

523 We thank Cari Dowling for technical assistance, Dr. Amy Gleichman and Dr. S. Thomas  
524 Carmichael for assistance with the photothrombotic technique, and Dr. Uri Manor for advice  
525 with imaging acquisition. This work was supported by NIH NINDS grant NS105742 to NJA.  
526 Work in the lab of N.J.A. is supported by the Hearst Foundation, the Pew Foundation, and the  
527 CZI Neurodegeneration Network. This work was supported by Core Facilities of the Salk  
528 Institute (Biophotonics: NIH NCI CCSG P30 014195, the Waitt, Helmsley and Chapman  
529 Foundations).

530

531 **Author contribution statement**

532 EB-S designed and performed experiments and conducted analysis, with input from NJA. EB-  
533 S and NJA conceived the project and wrote the manuscript.

534

535 **Disclosure**

536 The authors declare no conflict of interest.

537

538 **Supplementary Information**

539 Supplementary material consisting of 5 Figures and 1 Table can be found at the journal  
540 website.

541 **References**

- 542 1. Xing C, Arai K, Lo EH, Hommel M. Pathophysiologic cascades in ischemic stroke.  
543 *International journal of stroke : official journal of the International Stroke Society.*  
544 2012;7(5):378-85.
- 545 2. Heiss W-D. The ischemic penumbra: how does tissue injury evolve? *Annals of the New*  
546 *York Academy of Sciences.* 2012;1268(1):26-34.
- 547 3. Carmichael ST. Rodent models of focal stroke: Size, mechanism, and purpose.  
548 *NeuroRX.* 2005;2(3):396-409.
- 549 4. Au - Labat-gest V, Au - Tomasi S. Photothrombotic Ischemia: A Minimally Invasive and  
550 Reproducible Photochemical Cortical Lesion Model for Mouse Stroke Studies. *JoVE.*  
551 2013(76):e50370.
- 552 5. Krakauer JW, Carmichael ST, Corbett D, Wittenberg GF. Getting Neurorehabilitation  
553 Right: What Can Be Learned From Animal Models? *Neurorehabilitation and Neural Repair.*  
554 2012;26(8):923-31.
- 555 6. Dobkin BH, Carmichael ST. The Specific Requirements of Neural Repair Trials for  
556 Stroke. *Neurorehabilitation and Neural Repair.* 2015;30(5):470-8.
- 557 7. Barreto G, White RE, Ouyang Y, Xu L, Giffard RG. Astrocytes: targets for  
558 neuroprotection in stroke. *Central nervous system agents in medicinal chemistry.*  
559 2011;11(2):164-73.
- 560 8. Sun L, Zhang Y, Liu E, Ma Q, Anatol M, Han H, et al. The roles of astrocyte in the brain  
561 pathologies following ischemic stroke. *Brain Injury.* 2019;33(6):712-6.
- 562 9. Blanco-Suárez E, Caldwell ALM, Allen NJ. Role of astrocyte–synapse interactions in  
563 CNS disorders. *The Journal of Physiology.* 2017;595(6):1903-16.
- 564 10. Wolf SA, Boddeke HWGM, Kettenmann H. Microglia in Physiology and Disease.  
565 *Annual Review of Physiology.* 2017;79(1):619-43.
- 566 11. Sofroniew MV. Astrogliosis. *Cold Spring Harb Perspect Biol.* 2014;7(2):a020420.
- 567 12. Burda Joshua E, Sofroniew Michael V. Reactive Gliosis and the Multicellular  
568 Response to CNS Damage and Disease. *Neuron.* 2014;81(2):229-48.
- 569 13. Xu S, Lu J, Shao A, Zhang JH, Zhang J. Glial Cells: Role of the Immune Response in  
570 Ischemic Stroke. *Frontiers in Immunology.* 2020;11:294.
- 571 14. Jayaraj RL, Azimullah S, Beiram R, Jalal FY, Rosenberg GA. Neuroinflammation:  
572 friend and foe for ischemic stroke. *Journal of Neuroinflammation.* 2019;16(1):142.
- 573 15. Allen NJ. Astrocyte Regulation of Synaptic Behavior. *Annual review of cell and*  
574 *developmental biology.* 2014;30(1):439-63.
- 575 16. Christopherson KS, Ullian EM, Stokes CCA, Mallowney CE, Hell JW, Agah A, et al.  
576 Thrombospondins Are Astrocyte-Secreted Proteins that Promote CNS Synaptogenesis. *Cell.*  
577 2005;120(3):421-33.
- 578 17. Liauw J, Hoang S, Choi M, Eroglu C, Choi M, Sun G-h, et al. Thrombospondins 1 and  
579 2 are Necessary for Synaptic Plasticity and Functional Recovery after Stroke. *Journal of*  
580 *Cerebral Blood Flow & Metabolism.* 2008;28(10):1722-32.
- 581 18. Blanco-Suarez E, Liu T-F, Kopelevich A, Allen NJ. Astrocyte-Secreted Chordin-like 1  
582 Drives Synapse Maturation and Limits Plasticity by Increasing Synaptic GluA2 AMPA  
583 Receptors. *Neuron.* 2018;100(5):1116-32.e13.
- 584 19. Espinosa JS, Stryker Michael P. Development and Plasticity of the Primary Visual  
585 Cortex. *Neuron.* 2012;75(2):230-49.
- 586 20. Adelson Jaimie D, Barreto George E, Xu L, Kim T, Brott Barbara K, Ouyang Y-B, et al.  
587 Neuroprotection from Stroke in the Absence of MHCI or PirB. *Neuron.* 2012;73(6):1100-7.
- 588 21. Murphy TH, Corbett D. Plasticity during stroke recovery: from synapse to behaviour.  
589 *Nature Reviews Neuroscience.* 2009;10:861.
- 590 22. Brown CE, Wong C, Murphy TH. Rapid Morphologic Plasticity of Peri-Infarct Dendritic  
591 Spines After Focal Ischemic Stroke. *Stroke.* 2008;39(4):1286-91.
- 592 23. Berry KP, Nedivi E. Spine Dynamics: Are They All the Same? *Neuron.* 2017;96(1):43-  
593 55.

- 594 24. Zamanian JL, Xu L, Foo LC, Nouri N, Zhou L, Giffard RG, et al. Genomic Analysis of  
595 Reactive Astrogliosis. *The Journal of Neuroscience*. 2012;32(18):6391-410.
- 596 25. Jones EV, Bernardinelli Y, Zarruk JG, Chierzi S, Murai KK. SPARC and GluA1-  
597 Containing AMPA Receptors Promote Neuronal Health Following CNS Injury. *Frontiers in*  
598 *cellular neuroscience*. 2018;12:22-.
- 599 26. Pajarillo E, Rizor A, Lee J, Aschner M, Lee E. The role of astrocytic glutamate  
600 transporters GLT-1 and GLAST in neurological disorders: Potential targets for  
601 neurotherapeutics. *Neuropharmacology*. 2019;161:107559.
- 602 27. Alia C, Spalletti C, Lai S, Panarese A, Lamola G, Bertolucci F, et al. Neuroplastic  
603 Changes Following Brain Ischemia and their Contribution to Stroke Recovery: Novel  
604 Approaches in Neurorehabilitation. *Frontiers in cellular neuroscience*. 2017;11:76-.
- 605 28. Sofroniew MV. Molecular dissection of reactive astrogliosis and glial scar formation.  
606 *Trends Neurosci*. 2009;32(12):638-47.
- 607 29. Brenner M. Role of GFAP in CNS injuries. *Neuroscience Letters*. 2014;565:7-13.
- 608 30. Ito D, Tanaka K, Suzuki S, Dembo T, Fukuuchi Y. Enhanced expression of Iba1,  
609 ionized calcium-binding adapter molecule 1, after transient focal cerebral ischemia in rat brain.  
610 *Stroke*. 2001;32(5):1208-15.
- 611 31. Papadopoulos CM, Tsai SY, Cheatwood JL, Bollnow MR, Kolb BE, Schwab ME, et al.  
612 Dendritic plasticity in the adult rat following middle cerebral artery occlusion and Nogo-a  
613 neutralization. *Cereb Cortex*. 2006;16(4):529-36.
- 614 32. Brown CE, Li P, Boyd JD, Delaney KR, Murphy TH. Extensive Turnover of Dendritic  
615 Spines and Vascular Remodeling in Cortical Tissues Recovering from Stroke. *The Journal of*  
616 *Neuroscience*. 2007;27(15):4101-9.
- 617 33. Zhu L, Wang L, Ju F, Ran Y, Wang C, Zhang S. Transient global cerebral ischemia  
618 induces rapid and sustained reorganization of synaptic structures. *Journal of Cerebral Blood*  
619 *Flow & Metabolism*. 2017;37(8):2756-67.
- 620 34. Takatsuru Y, Fukumoto D, Yoshitomo M, Nemoto T, Tsukada H, Nabekura J. Neuronal  
621 Circuit Remodeling in the Contralateral Cortical Hemisphere during Functional Recovery from  
622 Cerebral Infarction. *The Journal of Neuroscience*. 2009;29(32):10081.
- 623 35. Belov Kirdajova D, Kriska J, Tureckova J, Anderova M. Ischemia-Triggered Glutamate  
624 Excitotoxicity From the Perspective of Glial Cells. *Frontiers in Cellular Neuroscience*.  
625 2020;14:51.
- 626 36. Laredo C, Zhao Y, Rudilosso S, Renú A, Pariente JC, Chamorro Á, et al. Prognostic  
627 Significance of Infarct Size and Location: The Case of Insular Stroke. *Scientific reports*.  
628 2018;8(1):9498-.
- 629 37. Samanta J, Alden T, Gobeske K, Kan L, Kessler JA. Noggin protects against ischemic  
630 brain injury in rodents. *Stroke*. 2010;41(2):357-62.
- 631 38. Liu L-r, Liu J-c, Bao J-s, Bai Q-q, Wang G-q. Interaction of Microglia and Astrocytes in  
632 the Neurovascular Unit. *Frontiers in Immunology*. 2020;11:1024.
- 633 39. Liddelow SA, Guttenplan KA, Clarke LE, Bennett FC, Bohlen CJ, Schirmer L, et al.  
634 Neurotoxic reactive astrocytes are induced by activated microglia. *Nature*.  
635 2017;541(7638):481-7.
- 636 40. Chang C-F, Lin S-Z, Chiang Y-H, Morales M, Chou J, Lein P, et al. Intravenous  
637 Administration of Bone Morphogenetic Protein-7 After Ischemia Improves Motor Function in  
638 Stroke Rats. *Stroke*. 2003;34(2):558-64.
- 639 41. Nakayama N, Han C-yE, Scully S, Nishinakamura R, He C, Zeni L, et al. A Novel  
640 Chordin-like Protein Inhibitor for Bone Morphogenetic Proteins Expressed Preferentially in  
641 Mesenchymal Cell Lineages. *Developmental Biology*. 2001;232(2):372-87.
- 642 42. Arundine M, Tymianski M. Molecular mechanisms of calcium-dependent  
643 neurodegeneration in excitotoxicity. *Cell Calcium*. 2003;34(4):325-37.

644



## Figure 1

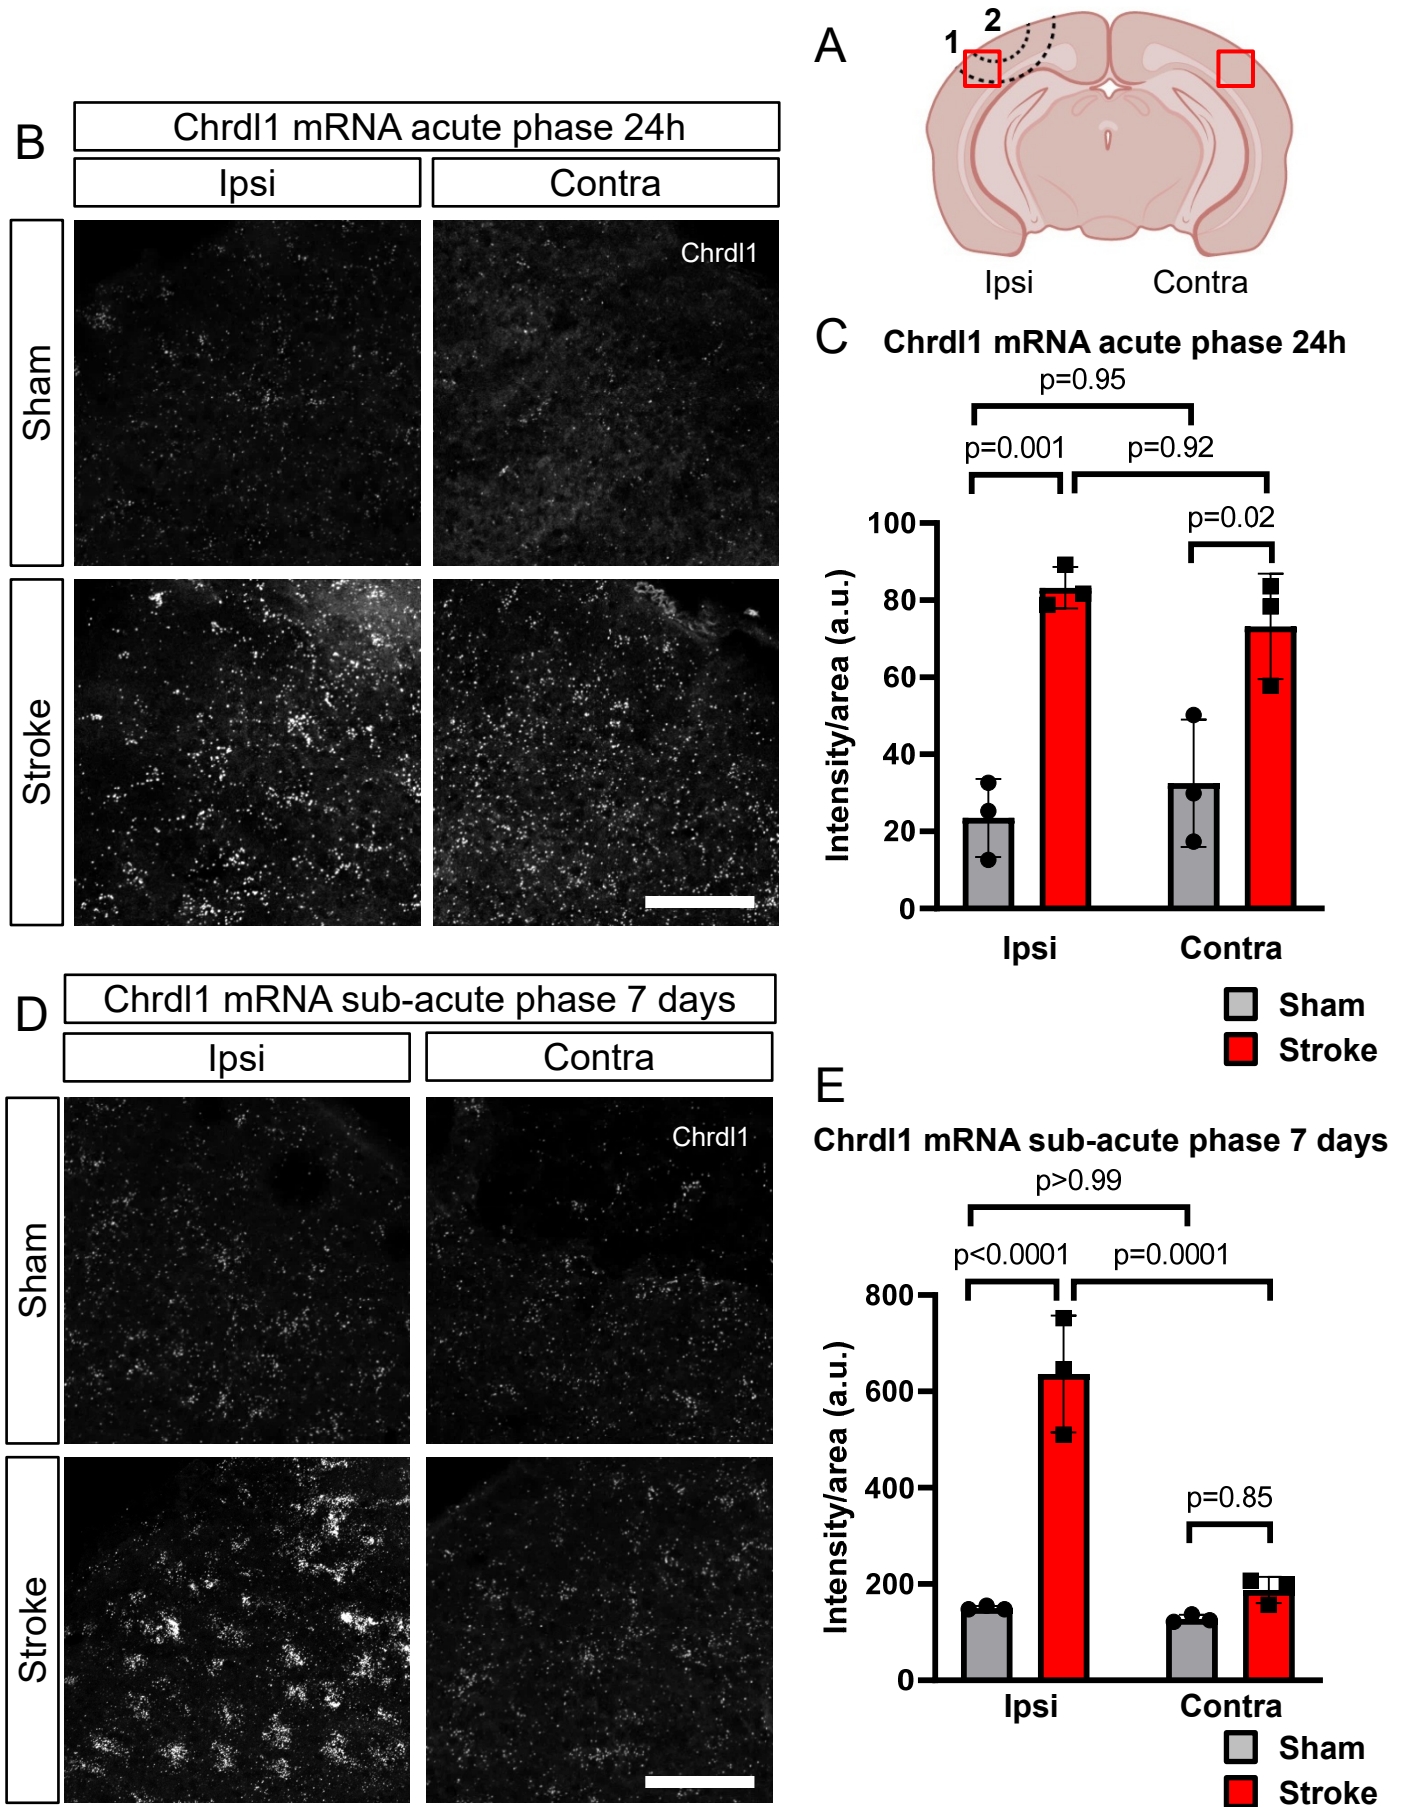

### **Figure 1. Chrdl1 expression increases in response to ischemic conditions**

A) Schematic drawing of a coronal section of a mouse brain showing where the ischemic injury was applied. Region labelled as 1 delimited by two dashed lines indicates the peri-infarct area, and label 2 delimited by a dashed line corresponds to the core, the brain region illuminated with the laser in order to cause the photothrombotic lesion. Red boxes indicate the region of interest (ROI) imaged and analyzed in all experiments in the hemisphere of the stroke (ipsi) and the homologous contralateral region (contra), unless noted differently. B) Representative images of fluorescent *in situ* hybridization (FISH) of Chrdl1 in the peri-infarct area (ipsilateral hemisphere, ipsi) and in the homologous contralateral hemisphere (contra) to the ischemic stroke lesion of coronal sections 24 hours after stroke or sham surgeries. Images were taken in layers 2/3 of the visual cortex. C) Quantification of fluorescence intensity per unit area. Sham mice N=3, stroke N=3. D, E) Same as B, C, 7 days after stroke or sham surgeries. Sham N=3, stroke N=3. Statistics by two-way ANOVA. Scale bar 100 $\mu$ m.

Figure 2

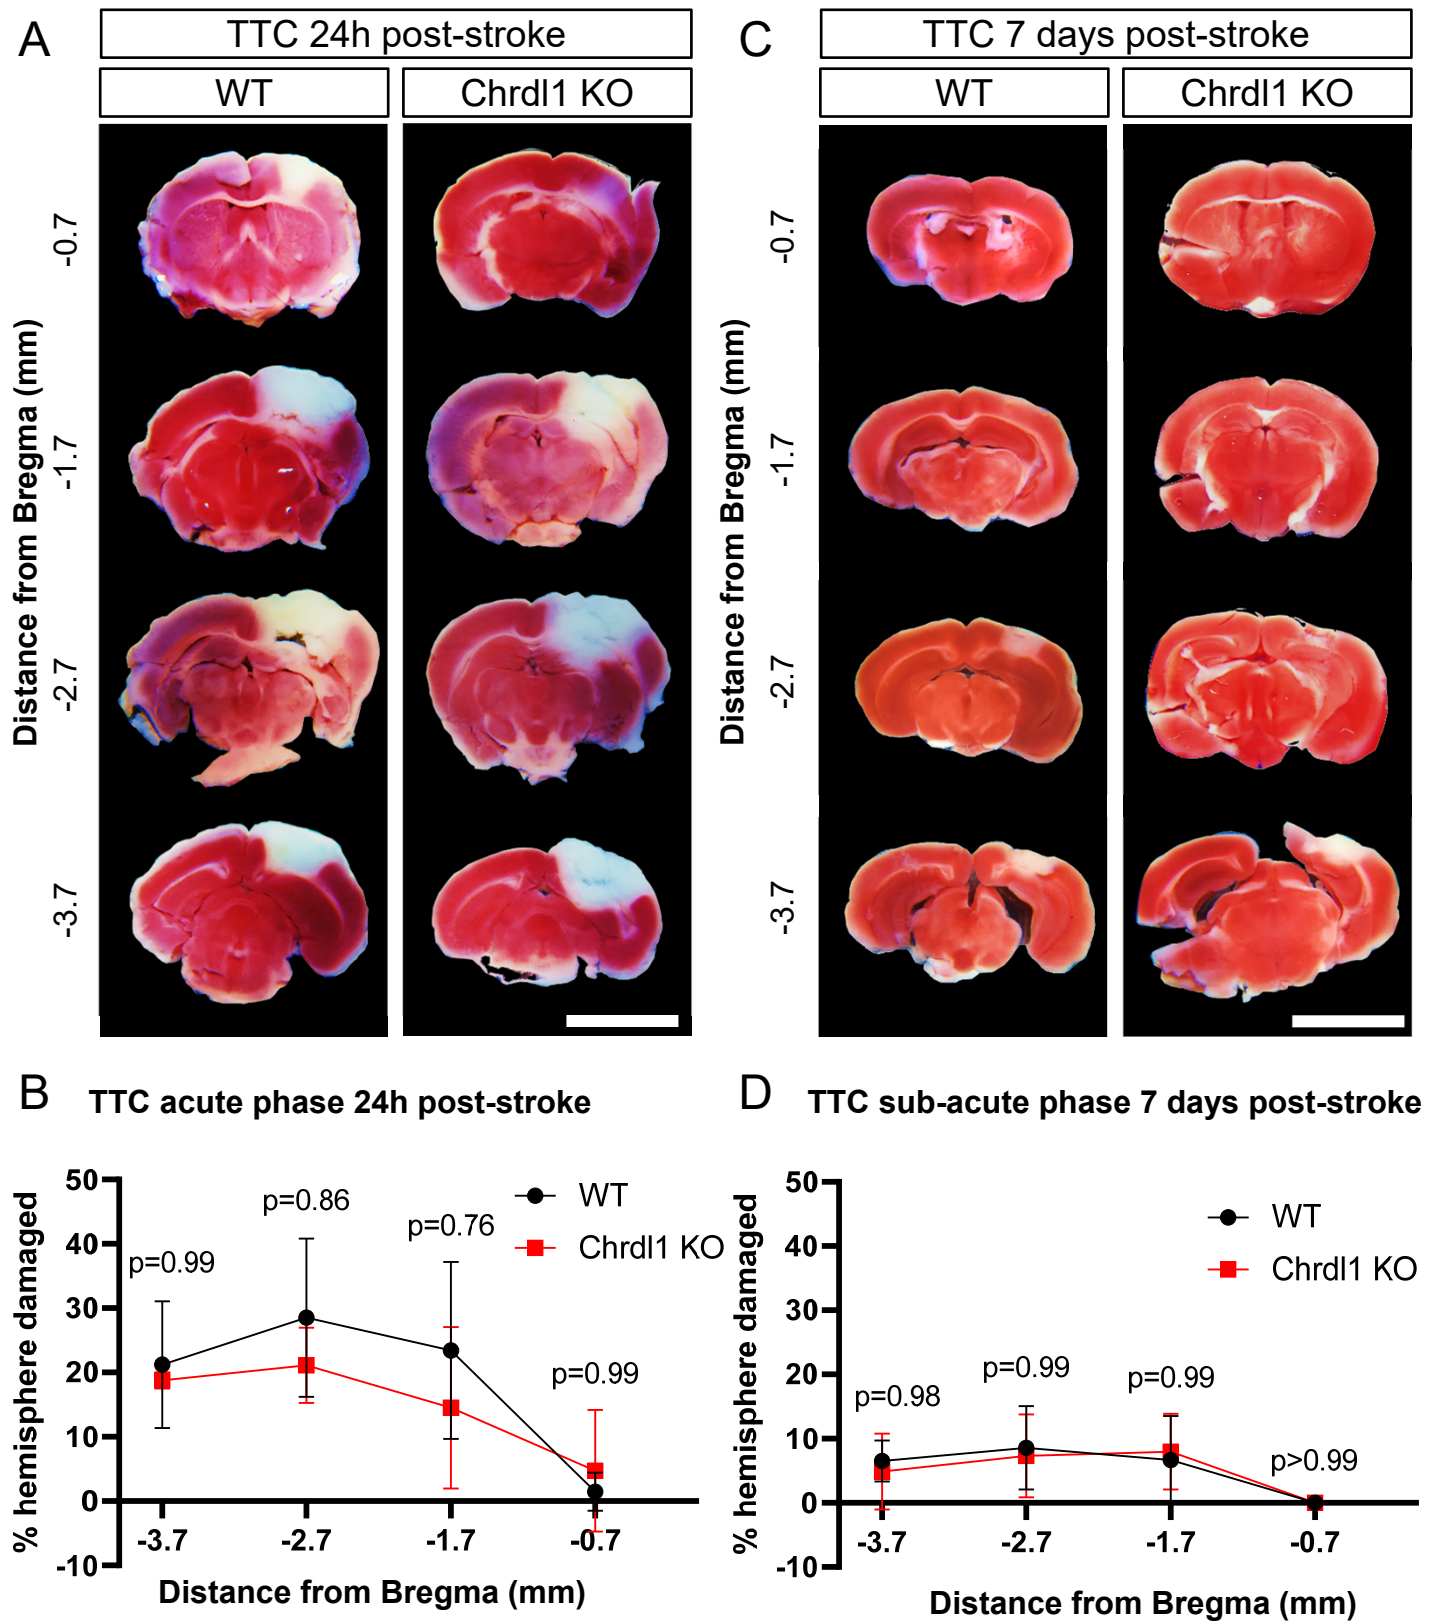

**Figure 2. Absence of Chrdl1 does not affect injury volume**

A) Representative images of 1mm-thick coronal sections of WT and Chrdl1 KO mouse brains 24 hours after stroke stained with TTC, corresponding to 0.7, 1.7, 2.7 and 3.7mm posterior from Bregma. The dead tissue (brain regions infarcted) is not stained by TTC and appears white, whereas the rest of the tissue turns a shade of red. B) Quantification of the volume of the injury as percentage of the total volume of the ipsilateral hemisphere. WT N=4, Chrdl1 KO N=4. C, D) Same as A, B, 7 days after stroke stained with TTC. WT N=4, Chrdl1 KO N=6. Statistics by two-way repeated measures ANOVA. Scale bar 5mm.

## Figure 3

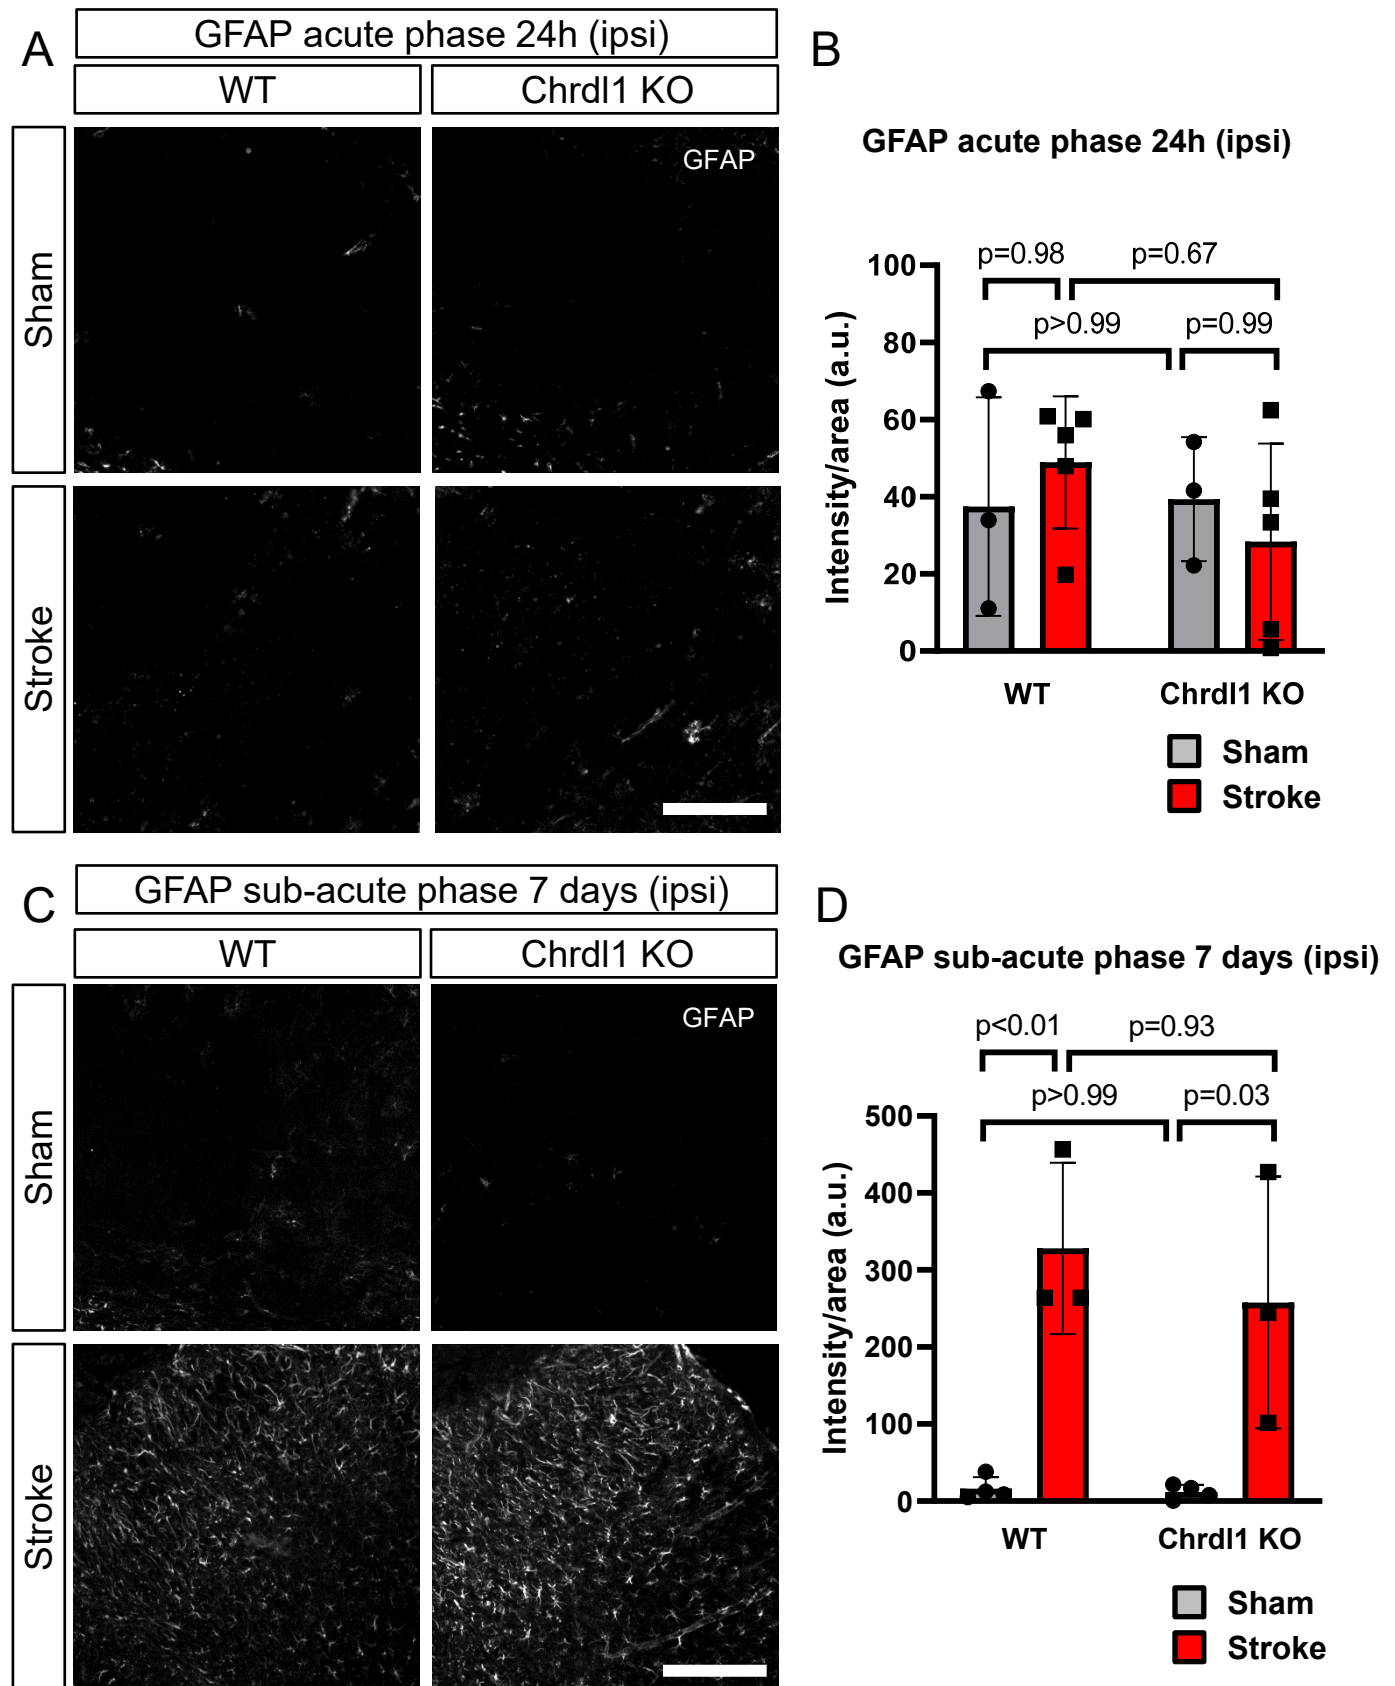

**Figure 3. Reactive astrogliosis is not impaired in Chrdl1 KO mice after stroke**

A) Representative images of the peri-infarct area of WT and Chrdl1 KO mouse cortex 24 hours after stroke or sham surgery immunostained for GFAP. B) Quantification of GFAP intensity per area unit. WT sham N=3, WT stroke N=5, Chrdl1 KO sham N=3 and Chrdl1 KO stroke N=5. C, D) Same as A, B, 7 days after stroke or sham surgery immunostained for GFAP. WT sham N=4, WT stroke N=3, Chrdl1 KO sham N=4 and Chrdl1 KO stroke N=3. Statistics by two-way ANOVA. Scale bar 200 $\mu$ m.

## Figure 4

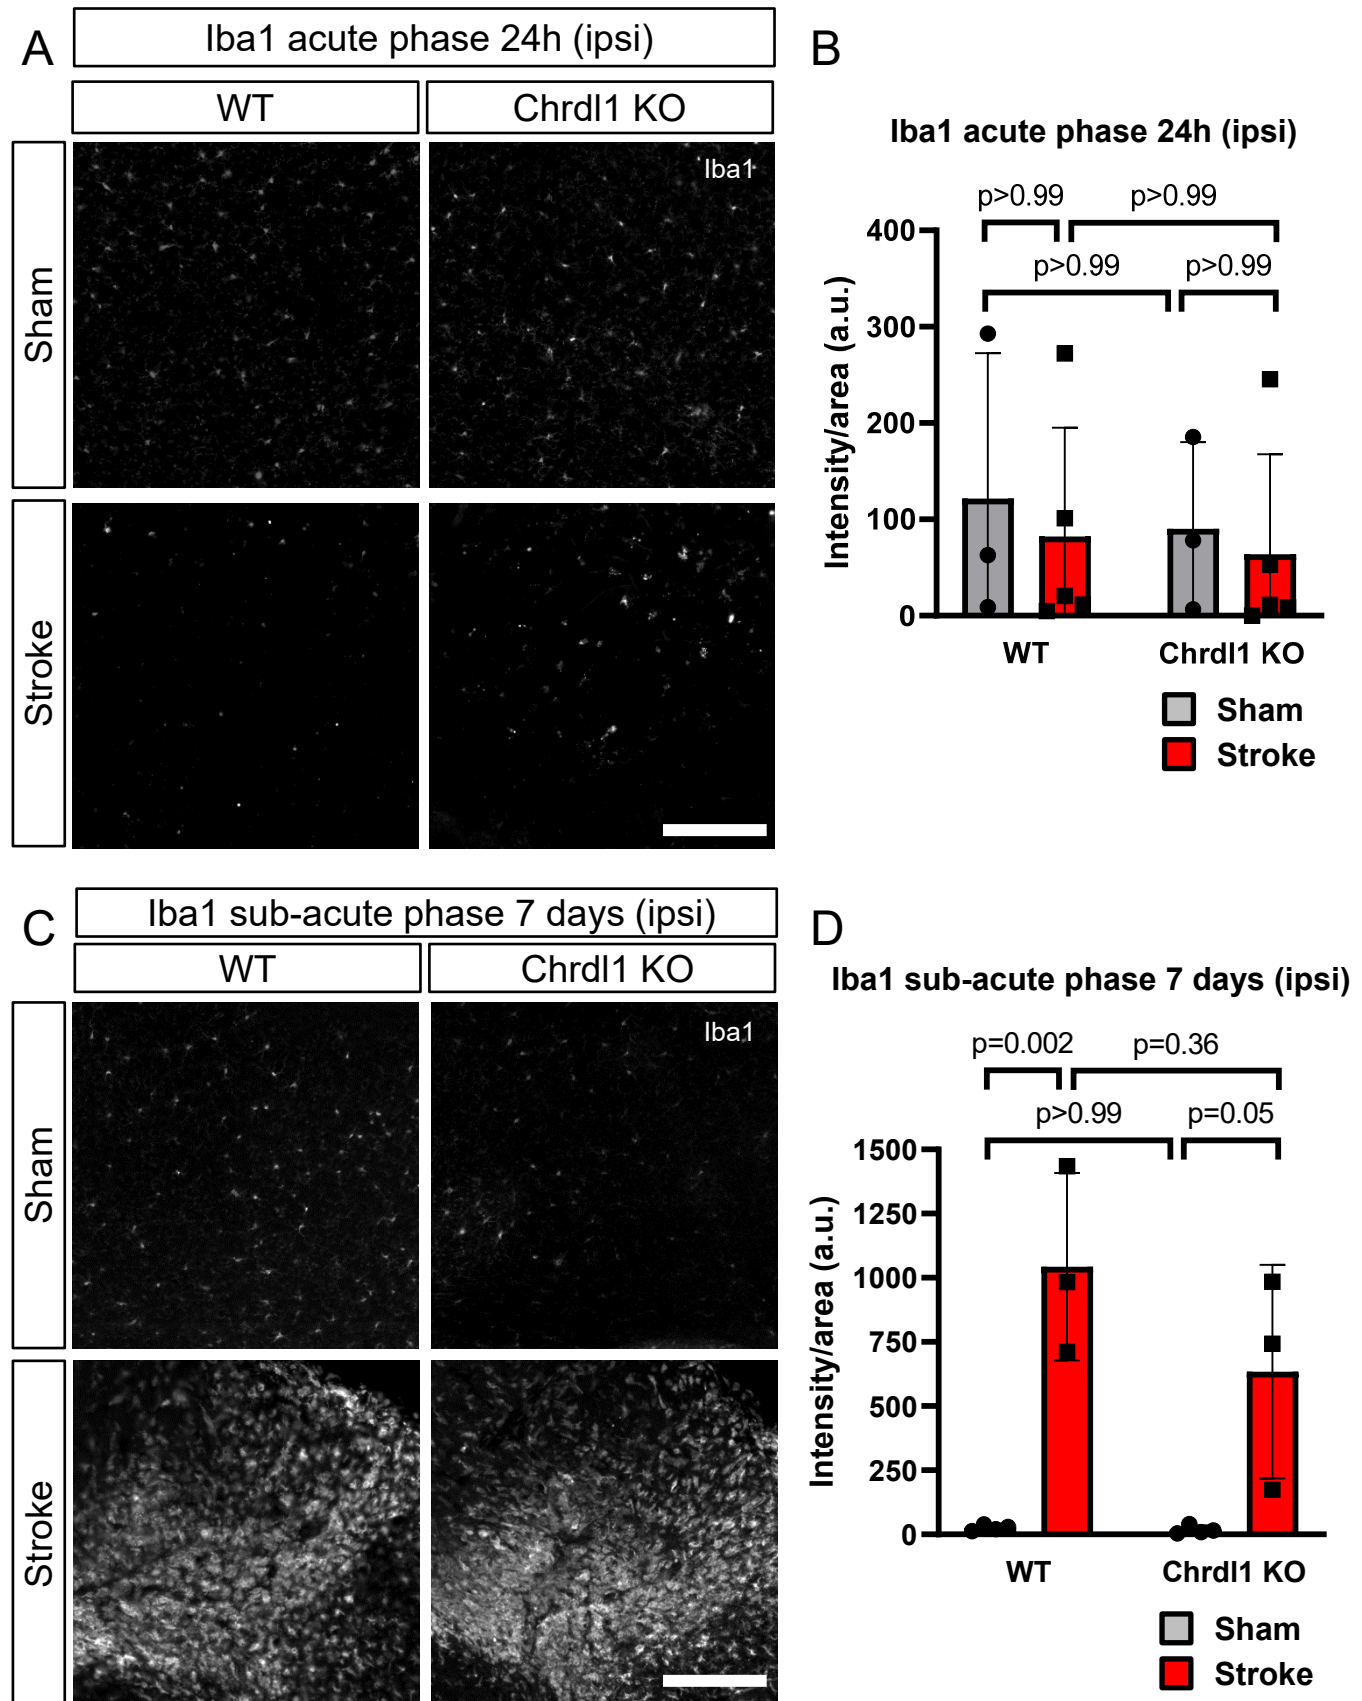

**Figure 4. Absence of Chrdl1 does not affect the microglia response after stroke**

A) Example images of the injury core of WT and Chrdl1 KO mouse cortex 24 hours after stroke or sham surgery immunostained for Iba1. B) Quantification of Iba1 intensity per area unit. WT sham N=3, WT stroke N=5, Chrdl1 KO sham N=3 and Chrdl1 KO stroke N=5. C, D) Same as A, B, 7 days after stroke or sham surgery immunostained for Iba1. WT sham N=4, WT stroke N=3, Chrdl1 KO sham N=4 and Chrdl1 KO stroke N=3. Statistics by two-way ANOVA. Scale bar 200 $\mu$ m.



## Figure 5

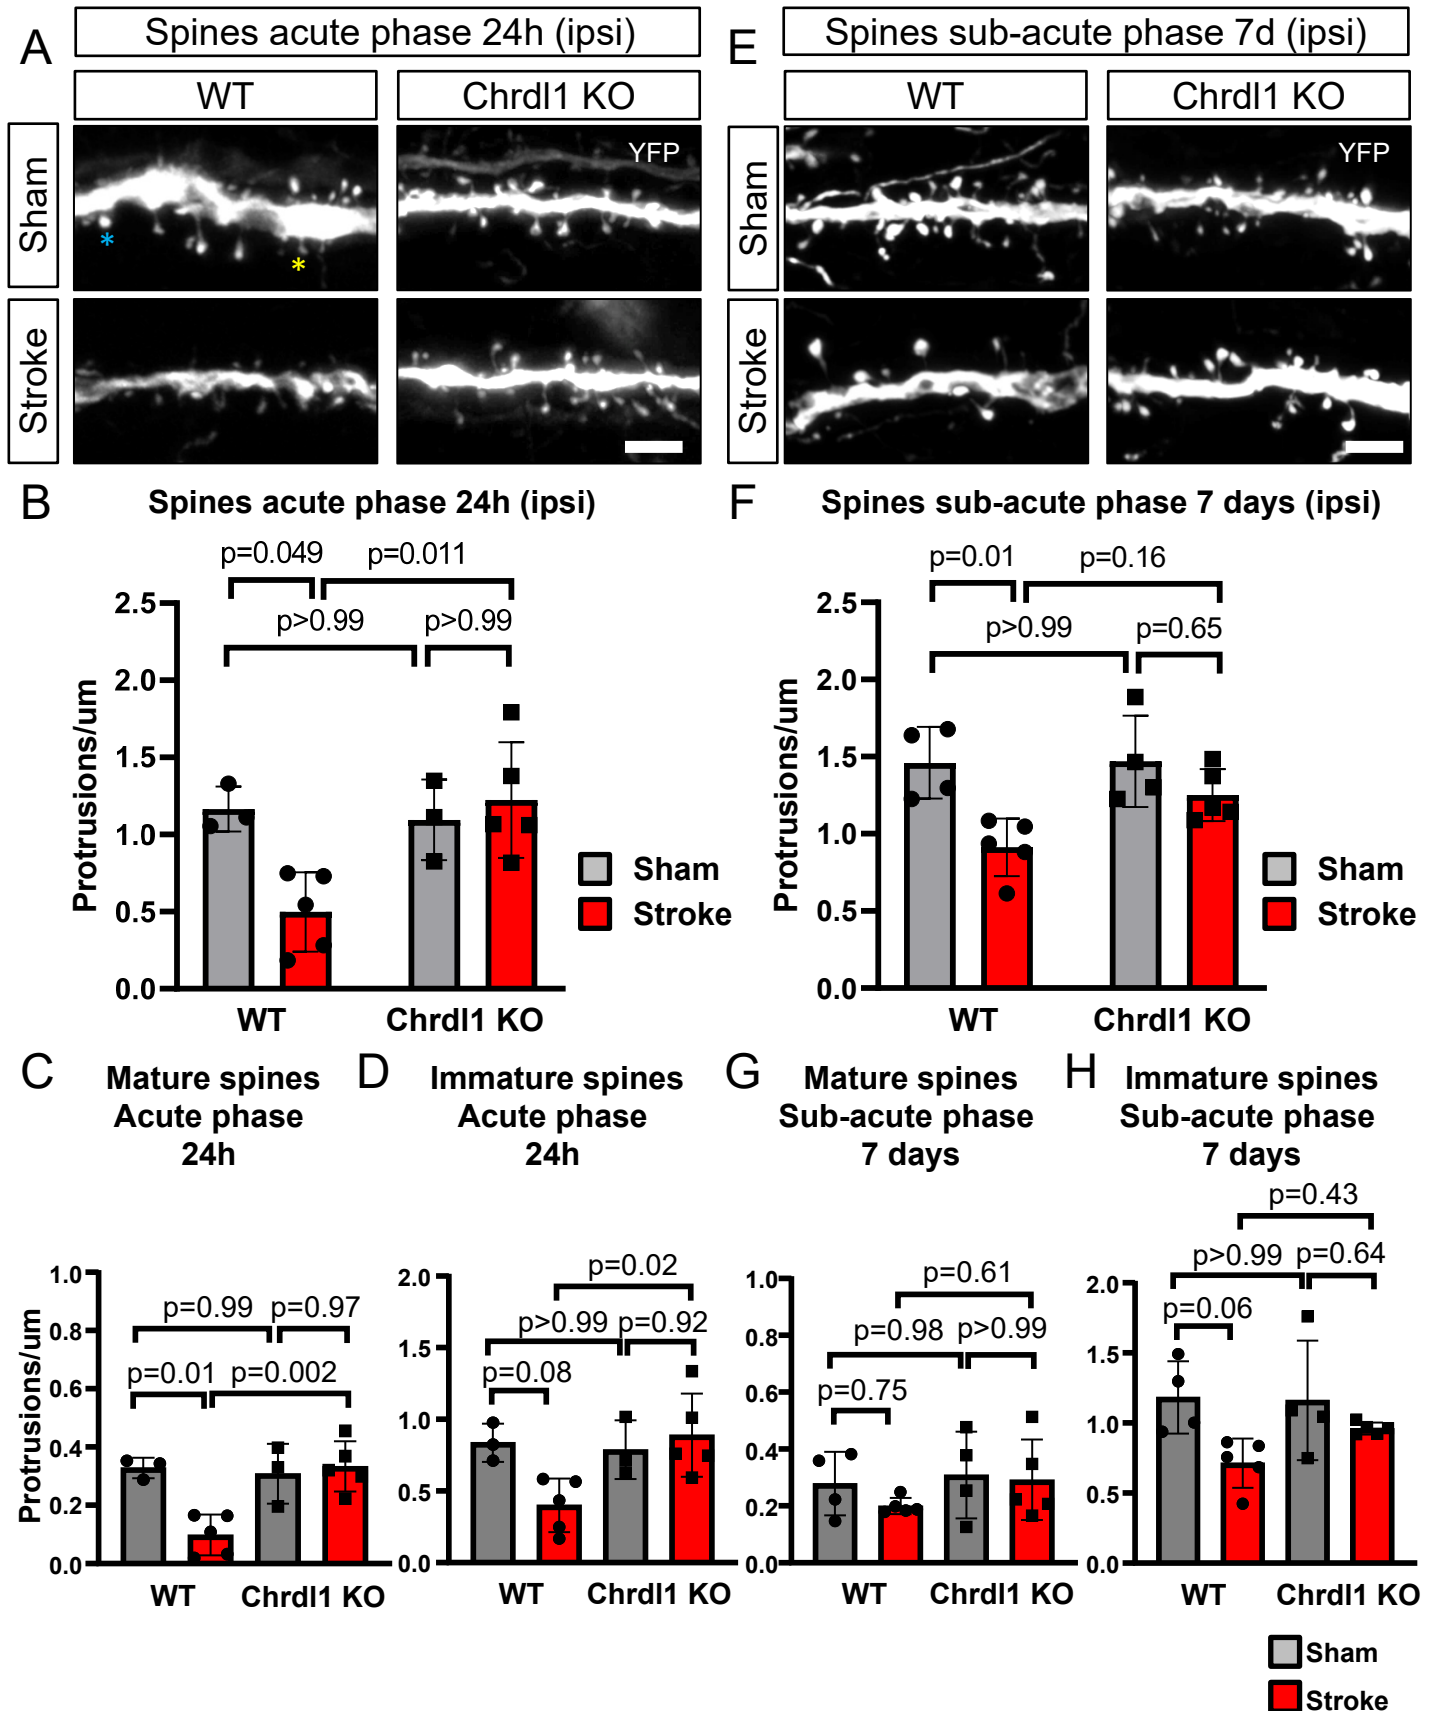

**Figure 5. Absence of Chrdl1 prevents spine loss in the peri-infarct area**

A) Representative images of YFP expressing layer 5 neuron secondary dendrites present in layers 2/3 of the visual cortex in WT or Chrdl1 KO mice, 24 hours after stroke or sham surgeries. The blue star indicates an example of a spine of mature morphology, and the yellow star indicates an example of a spine of immature morphology. B) Quantification of number of spines per  $\mu\text{m}$  in dendrites in layers 2/3 in the peri-infarct area of the visual cortex of mice 24 hours after stroke or sham surgery. WT sham N=3, WT stroke N=5, Chrdl1 KO sham N=3, Chrdl1 KO stroke N=5. Statistics by two-way ANOVA. C,D) Quantification of spines with mature (C) or immature (D) morphology in the peri-infarct area of dendrites in layers 2/3 of the visual cortex of mice 24 hours after stroke or sham surgery. WT sham N=3, WT stroke N=5, Chrdl1 KO sham N=3, Chrdl1 KO stroke N=5. Statistics by one-way ANOVA. E) Same as A, 7 days after stroke or sham surgery. F) Same as B, 7 days after stroke or sham surgery. WT sham N=4, WT stroke N=5, Chrdl1 KO sham N=4, Chrdl1 KO stroke N=5. Statistics by two-way ANOVA. G,H) Same as C, D, 7 days after stroke or sham surgery. WT sham N=4, WT stroke N=5, Chrdl1 KO sham N=4, Chrdl1 KO stroke N=5. Statistics by one-way ANOVA. Scale bars  $5\mu\text{m}$ .
